# Supplementary material for: Flexible-capron toughened epoxy/graphene nanocomposites for high k dielectric and ultraviolet radiation-resistant applications
Source: Royal Society of Chemistry journal article supplement (doi:10.1039/c4ra04213a), 2014-06-19
Supplement: c4ra04213a1.pdf [file c4ra04213a1.pdf]

## Flexible capron toughened epoxy/graphene nanocomposites for high k dielectric and ultra violet radiation resistant application

*K. Sethuraman<sup>a</sup>, P. Prabunathan<sup>a</sup> and M. Alagar<sup>a\*</sup>*

<sup>a</sup>Polymer Composite Lab, Department of Chemical Engineering, Anna University, Chennai, 600 025, India. \*E-mail: mkalagar@yahoo.com

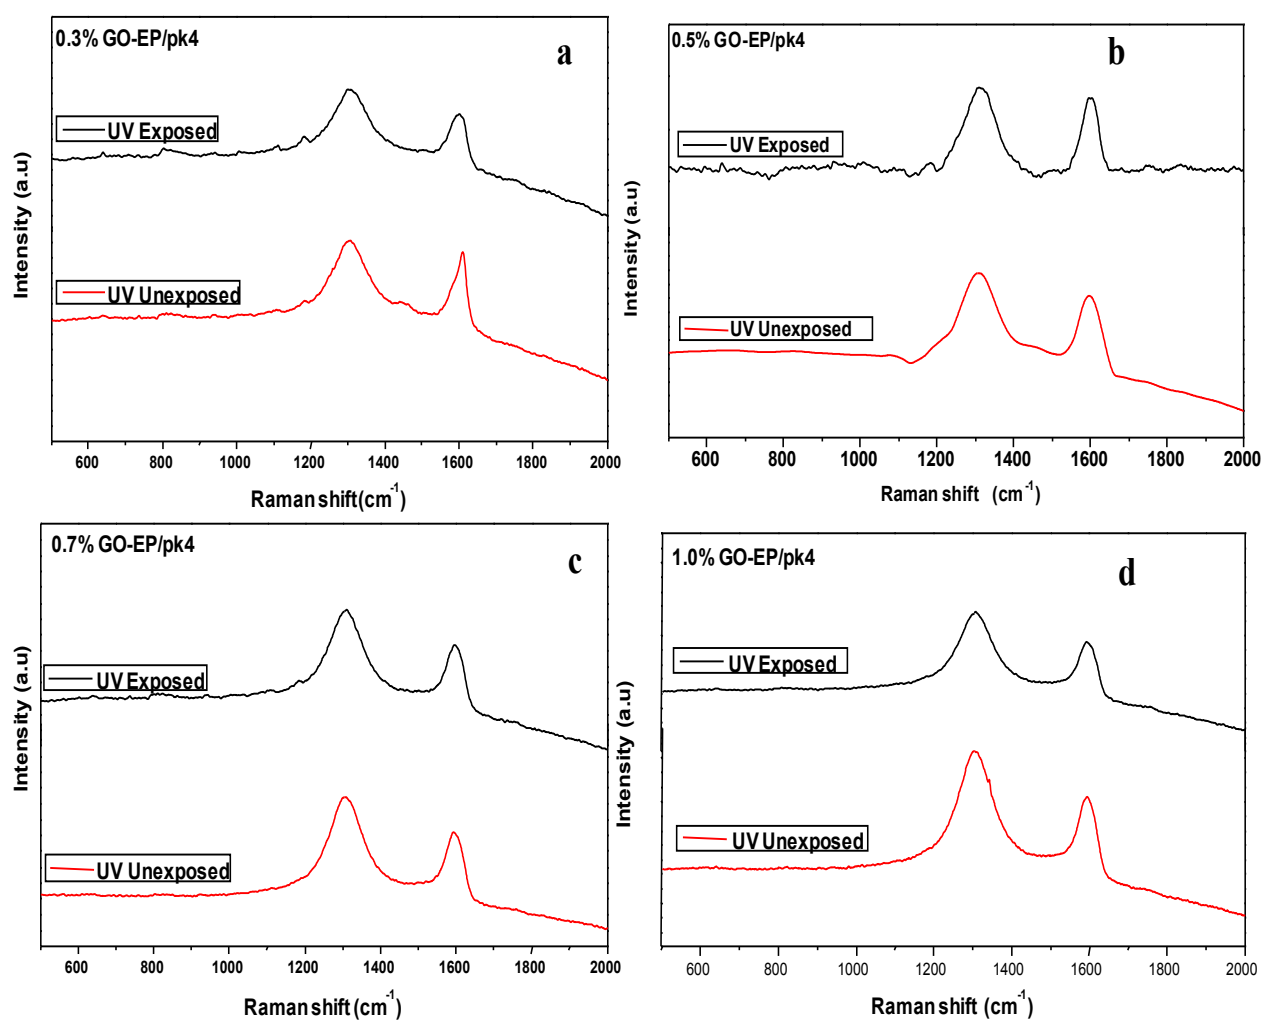

**Figure. S1. Raman Spectra of (a) 0.3 % GO- EP/pk4, (b) 0.5% GO -EP/pk4, (c) 0.7 % GO - EP/pk4 and (d) 1.0 % GO -EP/pk4 nanocomposites.**

**Table S2 Dielectric constant, Tensile strength and  $I_G/I_D$  of neat EP/pk4 and GO reinforced EP/pk4 nanocomposites**

| Sample          | Dielectric<br>Constant (K) at<br>1MHz | Tensile strength (MPa)      |                       | $I_G/I_D$                   |                             |
|-----------------|---------------------------------------|-----------------------------|-----------------------|-----------------------------|-----------------------------|
|                 |                                       | UV<br>un exposed<br>samples | UV exposed<br>samples | UV<br>un exposed<br>samples | UV<br>un exposed<br>samples |
| neat EP/Pk4     | 3.91                                  | 29.97                       | 15.49                 | -                           | -                           |
| 0.1% GO- EP/Pk4 | 4.94                                  | 39.02                       | 22.60                 | -                           | -                           |
| 0.3% GO- EP/Pk4 | 5.24                                  | 54.36                       | 36.89                 | 0.95                        | 0.92                        |
| 0.5% GO- EP/Pk4 | 6.82                                  | 63.42                       | 49.44                 | 0.91                        | 0.90                        |
| 0.7% GO- EP/Pk4 | 11.01                                 | 76.67                       | 66.18                 | 0.88                        | 0.84                        |
| 1.0% GO- EP/Pk4 | 6.10                                  | 40.56                       | 37.86                 | 0.85                        | 0.82                        |
